# Supplementary material for: Polymorphism and solvates of 1-acetyl-3-(phenyl)-5-(1-pyrenyl)pyrazoline: the structures, thermal and optical-physical properties
Source: Royal Society of Chemistry journal article supplement (doi:10.1039/c7ce01990d), 2018-01-01
Supplement: c7ce01990d1.pdf [file c7ce01990d1.pdf]

## Supporting information

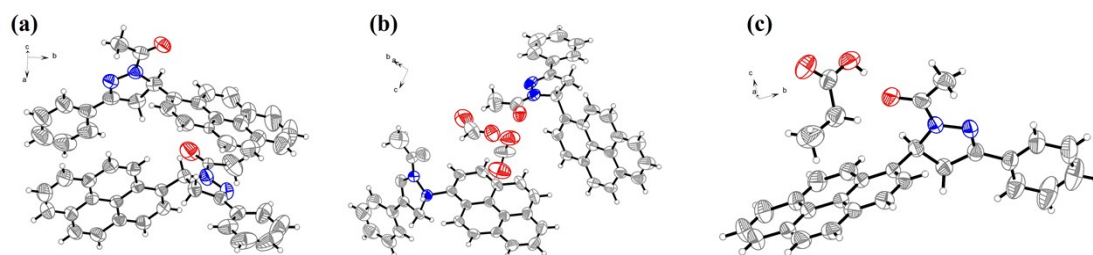

**Figure S1.** The ORTEP plots of the  $\beta$  polymorph (a), the formic acid (b) and propanoic acid (c) solvates.

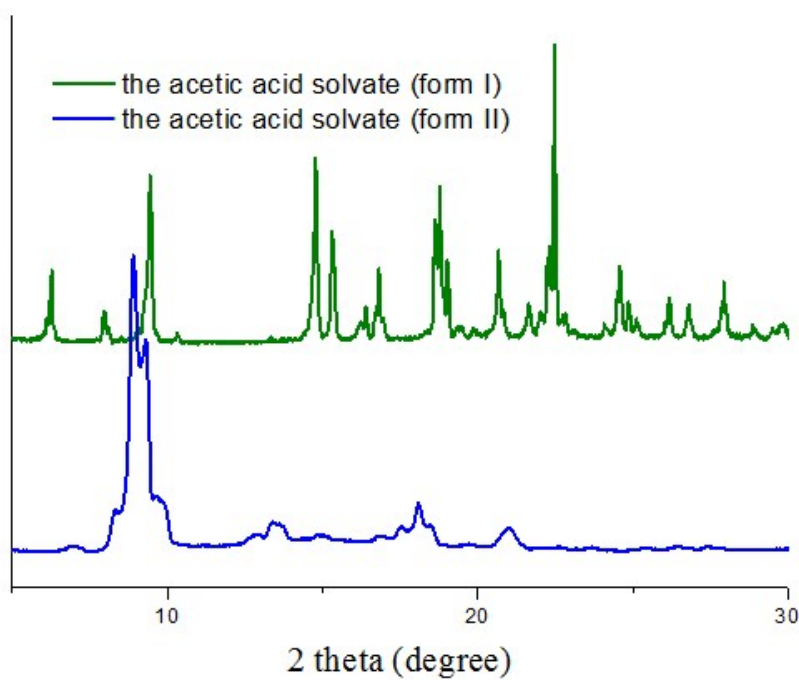

**Figure S2.** PXRD patterns of the acetic acid solvates of APPP (forms I and II).

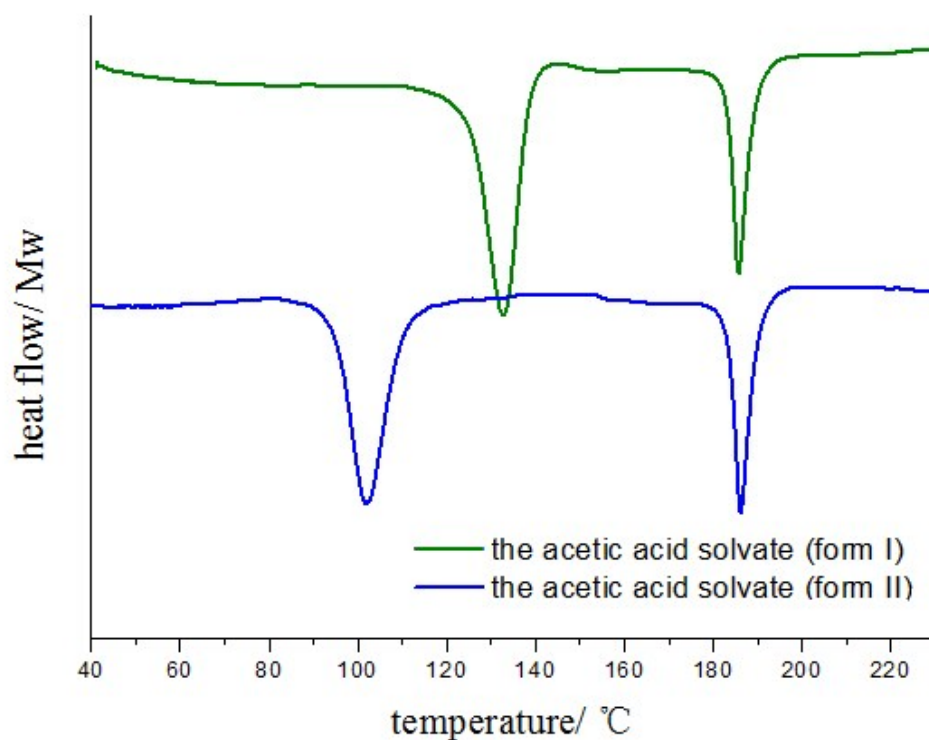

**Figure S3.** DSC profiles of the acetic acid solvates of APPP (forms I and II).

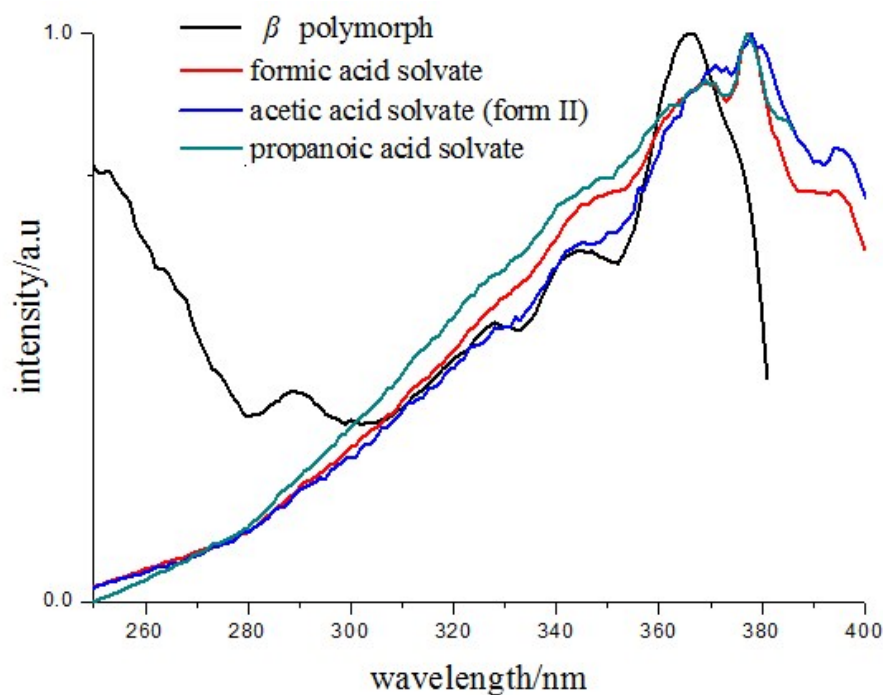

**Figure S4.** Excitation spectra for these crystals.
